# Supplementary material for: Three distinct classes of myenteric ganglia in mice and humans: insights from quantitative analyses
Source: PeerJ journal article supplement (doi:10.7717/peerj.19329), 2025-04-24
Supplement: TableS1.docx [file TableS1.docx]

| **Table S1. Information of myenteric ganglionic area in mice.** | | | |
| --- | --- | --- | --- |
|  | **M(μm2)** | **SD** | **Proportion** |
| **Cluster1** | 408.88 | 137.34 | 27.06% |
| **Cluster2** | 903.03 | 171.35 | 42.35% |
| **Cluster3** | 1614.66 | 290.97 | 30.59% |
| Note: M, mean; SD, Standard deviation | | | |
