# Supplementary material for: Three distinct classes of myenteric ganglia in mice and humans: insights from quantitative analyses
Source: PeerJ journal article supplement (doi:10.7717/peerj.19329), 2025-04-24
Supplement: TableS2.docx [file TableS2.docx]

| **Table S2. Information of myenteric intraganglion neuron count in mice.** | | | |
| --- | --- | --- | --- |
|  | **M(n)** | **SD** | **Proportion** |
| **Cluster1** | 2.13 | 1.03 | 63.16% |
| **Cluster2** | 7.33 | 1.80 | 23.68% |
| **Cluster3** | 16.40 | 3.65 | 13.16% |
| Note: M, mean; SD, Standard deviation | | | |
