# Supplementary material for: Three distinct classes of myenteric ganglia in mice and humans: insights from quantitative analyses
Source: PeerJ journal article supplement (doi:10.7717/peerj.19329), 2025-04-24
Supplement: TableS3.docx [file TableS3.docx]

| **Table S3. Information of Tuj1-positive cell clusters area in the anterior midgut at E11.5 mice.** | | | |
| --- | --- | --- | --- |
|  | **M(μm2)** | **SD** | **Proportion** |
| **Cluster1** | 14.90 | 1.89 | 39.39% |
| **Cluster2** | 21.25 | 1.95 | 45.45% |
| **Cluster3** | 30.63 | 3.77 | 15.15% |
| Note: M, mean; SD, Standard deviation | | | |
