# Supplementary material for: Three distinct classes of myenteric ganglia in mice and humans: insights from quantitative analyses
Source: PeerJ journal article supplement (doi:10.7717/peerj.19329), 2025-04-24
Supplement: TableS4.docx [file TableS4.docx]

| **Table S4. Information of Tuj1-positive cell clusters area in the posterior midgut at E11.5 mice.** | | | |
| --- | --- | --- | --- |
|  | **M(μm2)** | **SD** | **Proportion** |
| **Cluster1** | 21.09 | 4.34 | 62.29% |
| **Cluster2** | 38.02 | 6.07 | 27.05% |
| **Cluster3** | 64.18 | 14.05 | 10.66% |
| Note: M, mean; SD, Standard deviation | | | |
