# Supplementary material for: Three distinct classes of myenteric ganglia in mice and humans: insights from quantitative analyses
Source: PeerJ journal article supplement (doi:10.7717/peerj.19329), 2025-04-24
Supplement: TableS5.docx [file TableS5.docx]

| **Table S5. Information of Tuj1-positive cell clusters area within the gut of in vitro cultures.** | | | |
| --- | --- | --- | --- |
|  | **M(μm2)** | **SD** | **Proportion** |
| **Cluster1** | 55.37 | 11.00 | 50.96% |
| **Cluster2** | 97.08 | 16.13 | 36.54% |
| **Cluster3** | 155.17 | 30.15 | 12.50% |
| Note: M, mean; SD, Standard deviation | | | |
